# Supplementary material for: Efficient solution-processed narrowband green-emitting organic light emitting diodes sensitized by a thermally activated delayed fluorescence polymer
Source: Royal Society of Chemistry journal article supplement (doi:10.1039/d4tc03115f), 2024-01-01
Supplement: d4tc03115f1.pdf [file d4tc03115f1.pdf]

Supporting Information (SI)

**Efficient Solution-Processed Narrowband Green-Emitting  
Organic Light Emitting Diodes Sensitized by Thermally  
Activated Delayed Fluorescence Polymer**

Libing Yan<sup>a</sup>, Bitian Chen<sup>a, b</sup>, Dong Wang<sup>a</sup>, Ning Su<sup>a, \*</sup>, Lei Zhao<sup>c</sup>, Shumeng Wang<sup>c</sup>,  
Junqiao Ding<sup>a, b, \*</sup>

<sup>a</sup>School of Chemical Science and Technology, Yunnan University, Kunming 650091,  
P. R. China

<sup>b</sup>Southwest United Graduate School, Kunming 650092, P. R. China

<sup>c</sup>State Key Laboratory of Polymer Physics and Chemistry, Changchun Institute of  
Applied Chemistry, Chinese Academy of Sciences, Changchun 130022, P. R. China

Email: [suning@yun.edu.cn](mailto:suning@yun.edu.cn); [dingjunqiao@ynu.edu.cn](mailto:dingjunqiao@ynu.edu.cn)

## 1. General information

PEDOT:PSS (Clevios Al4083) was purchased from Heraeus Precious Metals GmbH Co. KG. PFI (Nafion,  $\geq 1.00$  meq  $g^{-1}$  exchange capacity) was purchased from Alfa-Aesar. Poly(TMTPA-DCB) were synthesized according to previously reported methods<sup>1</sup>. m-Cz-BNCz (3-(3,6-di-*tert*-butyl-9*H*-carbazol-9-yl)phenyl)-2,6-bis(3,6-di-*tert*-butyl-9*H*carbazol-9-yl) boron), mCP (1,3-bis(carbazol-9-yl)benzene), TSPO1 (diphenyl-4-triphenylsilylphenyl-phosphine oxide), TmPyPB (Tri(m-pyridin-3-ylphenyl)benzene, 1,3,5-Tris(3-pyridyl-3-phenyl)benzene), and LiF were bought from Luminescence Technology Corp.

## 2. Measurements and characterization

The UV-Vis absorption spectra were recorded by using a PerkinElmer Lambda 35 UV-vis spectrometer. The photoluminescence (PL) spectra, PL quantum yields (PLQYs), and low-temperature phosphorescence spectra were measured by using a Horiba Instruments Inc. FL3C-111 fluorescence spectrometer. And the film samples used for PLQYs were prepared by spin-coating the mCP, poly(TMTPA-DCB), and m-Cz-BNCz mixed solutions on the quartz substrate. The low-temperature phosphorescence spectra were obtained at 77 K under vacuum with a delay time of 0.01 ms to remove the fluorescent component. Transient PL spectra decay characteristics were recorded using a DeltaFlex™ Modular Fluorescence Lifetime System (Horiba Scientific) with an excitation wavelength of 300 nm in N<sub>2</sub>. The impedance spectroscopy measurement was carried out in a PARSTAT 3000A potentiostat in a 1.0 MHz - 1.0 Hz frequency range with an applied voltage of 4.0 V and AC signal of 0.1 V. Cyclic voltammetry (CV) measurements were recorded on an EG&G 283 potentiostat/galvanostat system from Princeton Applied Research.

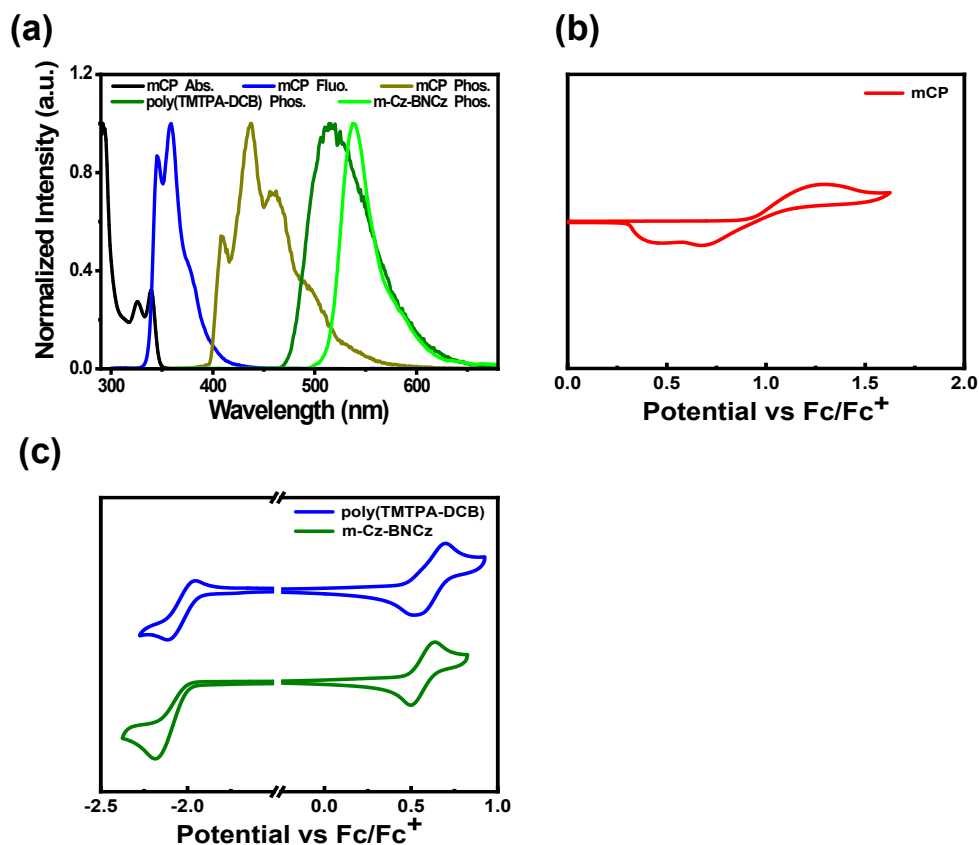

**Fig. S1** (a) Normalized UV-vis absorption, PL spectra of mCP; phosphorescence spectra of mCP, poly(TMTPA-DCB) and m-Cz-BNCz; (b) CV curves of mCP; (c) CV curves of poly(TMTPA-DCB) and m-Cz-BNCz.

**Table S1.** Summary of the photophysical properties of mCP, poly(TMTPA-DCB) and m-Cz-BNCz.

| Compound            | $\lambda_{\text{abs}}^a$<br>(nm) | $\lambda_{\text{PL}}^b$<br>(nm) | FWHM <sup>c</sup><br>(nm) | $E_{\text{S1}}^d$<br>[eV] | $E_{\text{T1}}^e$<br>[eV] | $\Delta E_{\text{ST}}^f$<br>[eV] | $E_g^g$<br>[eV] | HOMO <sup>h</sup><br>[eV] | LUMO <sup>i</sup><br>[eV] |
|---------------------|----------------------------------|---------------------------------|---------------------------|---------------------------|---------------------------|----------------------------------|-----------------|---------------------------|---------------------------|
| mCP                 | 340                              | 344                             | -                         | 3.67                      | 3.13                      | 0.54                             | 3.54            | -5.66                     | -2.12                     |
| poly(TMTPA-<br>DCB) | 390                              | 509                             | 84                        | 2.73                      | 2.63                      | 0.10                             | 2.67            | -5.23                     | -2.85                     |
| m-Cz-BNCz           | 484                              | 516                             | 39                        | 2.54                      | 2.42                      | 0.12                             | 2.42            | -5.27                     | -2.77                     |

<sup>a</sup> The peak wavelength of the lowest-energy absorption band; <sup>b</sup> The peak wavelength of the PL spectrum ( $1 \times 10^{-5}$  M toluene solution, 298 K); <sup>c</sup> Full width at half maximum of the PL spectrum; <sup>d</sup> Singlet energy estimated from the onset of the fluorescence spectrum ( $1 \times 10^{-5}$  M toluene solution, 298 K); <sup>e</sup> Triplet energy estimated from the onset of the phosphorescence spectrum ( $1 \times 10^{-5}$  M toluene solution, 77 K); <sup>f</sup>  $\Delta E_{\text{ST}} = E_{\text{S1}} - E_{\text{T1}}$ ; <sup>g</sup> Optical band gap estimated from the absorption edges of UV-vis spectrum; <sup>h, i</sup> Determined from cyclic voltammetry.

### 3. Calculation related to FET and DET processes

Firstly, according to the previous report,<sup>2</sup> we calculated the molar extinction coefficient of m-Cz-BNCz by UV-Vis absorption spectroscopy using the Lambert-Bier law.

$$A = \varepsilon CL\#(S - 1)$$

In equation (S-1), A is the absorbance at the peak position of the first exciton absorption peak, C is the molar concentration of m-Cz-BNCz (mol L<sup>-1</sup>), L is the optical path length of about 1 cm,  $\varepsilon$  is the molar extinction coefficient (L mol<sup>-1</sup>·cm<sup>-1</sup>).

Then secondly, the Förster energy transfer radius ( $R_{FET}$ ) is calculated by the expression as:

$$R_{FET}^6 = \frac{9000(\ln 10)k^2\phi_{PL}}{128\pi^5 N_A n^4} \int_0^{\infty} Fh(\lambda)\varepsilon g(\lambda)\lambda^4 d\lambda\#(S - 2)$$

In equation (S-2),  $\Phi_{PL}$  is PLQY of poly(TMTPA-DCB),  $\kappa^2$  is the transition dipole orientation factor with the value of 2/3,  $n$  is the refractive index with the value of 1.7,

$N_A$  is the Avogadro's number,  $\int_0^{\infty} Fh(\lambda)\varepsilon g(\lambda)\lambda^4 d\lambda$  is the overlap integral between the PL of poly(TMTPA-DCB) and the absorption of m-Cz-BNCz (Fig. 2a). In the overlap integral,  $Fh(\lambda)$  stands for the normalized donor emission spectrum, and  $\varepsilon g(\lambda)$  is the molar absorption coefficient of the acceptor<sup>2,3</sup>. According to equation (S-2), the  $R_{FET}$  calculation results in 4.15 nm for the hybrid of mCP: 10 wt.% poly(TMTPA-DCB): 2.0 wt.% m-Cz-BNCz.

The next, Förster energy transfer rate ( $k_{FET}$ ) values were calculated by following the expression as (S-3~S-6).

$$k_p = \frac{1}{\tau_p}\#(S - 3)$$

$$\tau_p^{polymer} = \frac{1}{k_{ISC} + k_r^s + k_{nr}^s}\#(S - 4)$$

In equation (S-3, S-4),  $\tau_p$  indicates a nanosecond-scale prompt fluorescence component for the poly(TMTPA-DCB),  $k_{ISC}$  is a rate constant of intersystem crossing,

$k_r^S$  and  $k_{nr}^S$  stand for the radiative and nonradiative decay rate, respectively<sup>4</sup>. Therefore, the  $\tau_p$  of the doped Emitting Layer with the FET process can be expressed by the expressions **(S-5)** and **(S-6)** ( $Dye_x$  denotes the m-Cz-BNCz content).

$$\tau_p^{Dye_x} = \frac{1}{k_{ISC} + k_r^S + k_{nr}^S + k_{FET}} \#(S-5)$$

$$k_{FET} = \frac{1}{\tau_p^{Dye_x}} - \frac{1}{\tau_p^{polymer}} \#(S-6)$$

Finally, the average distance between poly(TMTPA-DCB) and m-Cz-BNCz (R) was calculated following the expression as **(S-7)**:

$$k_{FRET} = \frac{1}{\tau} \left( \frac{R_{FET}}{R} \right)^6 \#(S-7)$$

Taking mCP: 10 wt.% poly(TMTPA-DCB): 2.0 wt.% m-Cz-BNCz as an example,  $k_{FET}$  and  $R$  were determined to be  $7.32 \times 10^7 \text{ s}^{-1}$  and 3.54 nm, respectively. Compared with the FET radius ( $R_{FET} = 4.15 \text{ nm}$ ), the lower  $R$  means that the FET could happen from poly(TMTPA-DCB) to m-Cz-BNCz (Table S3).

In addition, we also calculated  $k_{FET}$  and  $k_{DET}$  for different m-Cz-BNCz doping concentrations by expressions **(S-3)**, **(S-7 ~ S-11)**. (Table S2 and Fig. S2)

$$k_D = \frac{1}{\tau_D} \#(S-8)$$

$$k_{ISC} = k_P * (1 - \Phi_P) \#(S-9)$$

$$k_{RISC} = \left( \frac{k_P k_D}{k_{ISC}} \right) * \left( \frac{\Phi_D}{\Phi_P} \right) \#(S-10)$$

$$k_{DET} = \frac{1}{\tau_D^x} - \frac{1}{\tau_D^{polymer}} + k_{ISC} k_{RISC} * (\tau_P^x - \tau_P^{polymer}) \# (S-11)$$

**Table S2.** Summary of the PL characteristics and rate constants of mCP: 10 wt.% poly(TMTPA-DCB): x wt.% m-Cz-BNCz films (x = 0.0, 0.2, 0.4, 0.6, 1.0, 2.0) and mCP: 2.0 wt.% m-Cz-BNCz film.

| x wt.% | PLQY (%) | $\tau_p$ (ns) | $\tau_d$ ( $\mu$ s) | $\Phi_P$ (%) | $\Phi_D$ (%) | $k_{RISC}$ ( $10^5 \text{ s}^{-1}$ ) | $k_{ISC}$ ( $10^6 \text{ s}^{-1}$ ) | $k_{FET}$ ( $10^7 \text{ s}^{-1}$ ) | $k_{DET}$ ( $10^4 \text{ s}^{-1}$ ) |
|--------|----------|---------------|---------------------|--------------|--------------|--------------------------------------|-------------------------------------|-------------------------------------|-------------------------------------|
| 0.0    | 97.58    | 35.44         | 5.19                | 63.42        | 34.16        | 2.84                                 | 1.03                                | -                                   | -                                   |

|                          |       |       |      |       |       |      |      |      |       |
|--------------------------|-------|-------|------|-------|-------|------|------|------|-------|
| 0.2                      | 89.40 | 20.93 | 4.53 | 53.09 | 36.31 | 2.84 | 1.03 | 1.96 | 2.82  |
| 0.4                      | 86.00 | 13.86 | 4.08 | 50.03 | 35.97 | 2.84 | 1.03 | 4.39 | 5.22  |
| 0.6                      | 82.80 | 12.45 | 3.94 | 48.73 | 34.07 | 2.84 | 1.03 | 5.21 | 6.10  |
| 1.0                      | 74.00 | 11.05 | 3.25 | 47.69 | 26.31 | 2.84 | 1.03 | 6.23 | 11.51 |
| 2.0                      | 68.90 | 9.86  | 2.26 | 42.16 | 26.74 | 2.84 | 1.03 | 7.32 | 24.93 |
| 2.0<br>(without polymer) | 23.10 | 8.94  | 1.45 | 13.65 | 9.45  | 2.84 | 1.03 | -    | -     |

Experimental data is collected in neat films under nitrogen atmosphere;  $\tau_p$  and  $\tau_d$  are prompt and delayed lifetimes;  $\Phi_p$  and  $\Phi_d$  are PLQYs of prompt and delayed components;  $k_{ISC}$  and  $k_{RISC}$  are rate constants of intersystem crossing from  $S_1$  to  $T_1$  and reverse intersystem crossing from  $T_1$  to  $S_1$  in the poly(TMTPA-DCB);  $k_{FET}$  and  $k_{DET}$  are Förster energy transfer rate and Dexter energy transfer rate from poly(TMTPA-DCB) to m-Cz-BNCz, respectively.

**Table S3.** Summary of the FET calculation from poly(TMTPA-DCB) to m-Cz-BNCz.

| Compound  | Dopant concentration<br>(wt. %) | PLQY <sup>a</sup> | $J(\lambda)^b$<br>( $\text{mol}^{-1}\text{dm}^3\text{cm}^{-1}\text{nm}^4$ ) | $R_{FET}^c$<br>(nm) | $R^d$<br>(nm) |
|-----------|---------------------------------|-------------------|-----------------------------------------------------------------------------|---------------------|---------------|
| m-Cz-BNCz | 2.0                             | 69.9              | $1.30 \times 10^{15}$                                                       | 4.15                | 3.54          |

<sup>a</sup> PLQY measured using an integrating sphere in thin film; <sup>b</sup> spectral overlap between PL emission of poly(TMTPA-DCB) and absorption spectrum of m-Cz-BNCz; <sup>c</sup> FET radius; <sup>d</sup> intermolecular distance; <sup>e</sup> prompt fluorescence component of doped thin film; <sup>f</sup> FET rate constant.

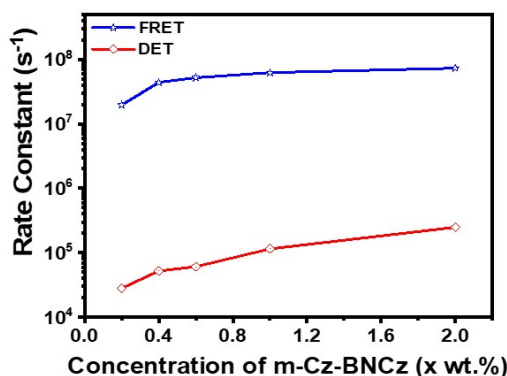

**Fig. S2** The FET and DET rate constants in the doped films of mCP: 10 wt.% poly(TMTPA-DCB): x wt.% m-Cz-BNCz (x = 0.0, 0.2, 0.4, 0.6, 1.0, and 2.0, respectively).

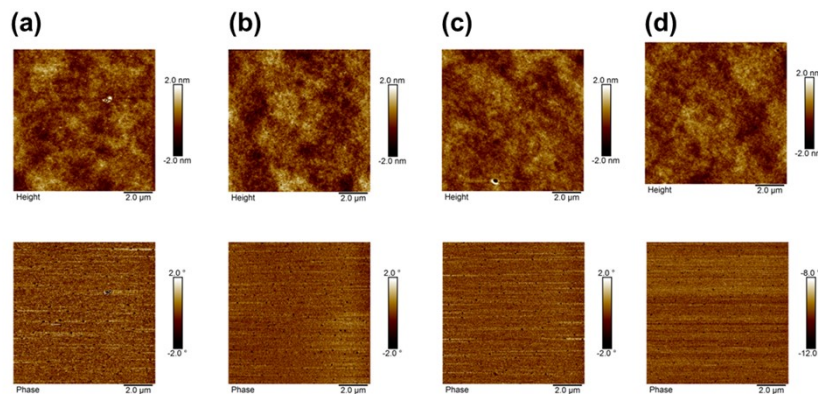

**Fig. S3** AFM morphology images for mCP: 10 wt.% poly(TMTPA-DCB): x wt.% m-Cz-BNCz ( $x = 0.2$  (a),  $0.4$  (b),  $0.6$  (c),  $1.0$  (d)). The RMS values were measured as 1.054, 1.092, 1.154 and 1.176 nm for m-Cz-BNCz doping concentrations ranging from 0.2 wt.% to 1.0 wt.%.

#### 4. Device fabrication and testing

The solution-processed devices were fabricated with a configuration of ITO/PEDOT: PSS + PFI (40 nm)/ EML (30 nm)/ TSPO1(8 nm)/ TmPyPB (42 nm)/ LiF (1 nm)/ Al (200 nm). Firstly, the cleaned ITO-coated substrates ( $15 \Omega$  per square) were treated with Ultraviolet-ozone (UVO) for 1 h. Secondly, the PEDOT: PSS (Clevios PVP A14083) mixed with PFI (volume ratio = 2:3) was spin-coated on the substrate in the air at a speed of 5000 rpm, annealed at  $120 \text{ }^\circ\text{C}$  for 1 h, and then transferred into a nitrogen-filled glove box. Then the chlorobenzene solution of m-Cz-BNCz doped into mCP and poly(TMTPA-DCB) at different concentrations were spin-coated at a speed of 1800 rpm for 60 s to form the 30 nm thickness of emitting layer (EML). After being transferred into a vacuum chamber, other functional layers including TSPO1 (8 nm), TmPyPB (42 nm), LiF (1 nm), and Al (200 nm) were thermally deposited layer-by-layer in sequence at a pressure under  $3 \times 10^{-4}$  Pa. The current density-voltage-luminance (J-V-L) characteristics of all fabricated devices were measured using Keithley 2000 and Keithley 2400 (fitted with calibrated silicon photodiode) systems. The EL spectra and CIE coordinates were measured using a CS2000 spectrometer. EQE was calculated from the EL spectrum, luminance, and current density assuming a

Lambertian emission distribution. All the measurements were performed at room temperature and air atmosphere.

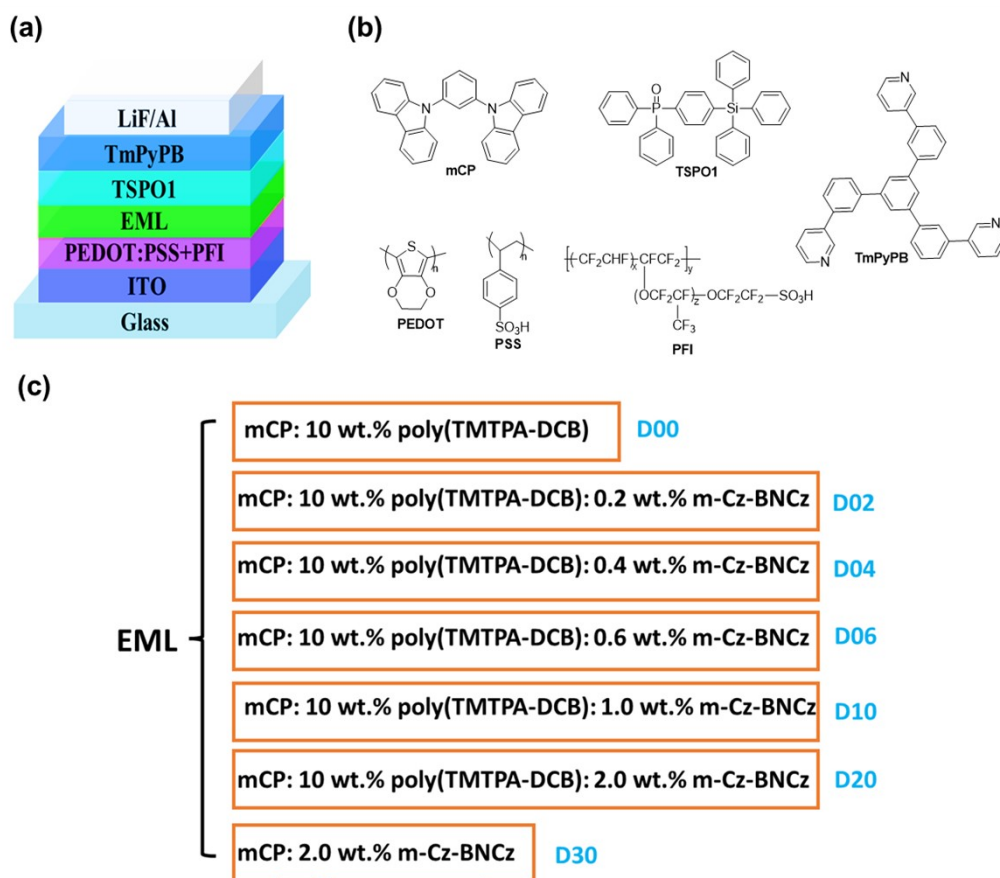

**Fig. S4** (a) Solution processed device structure in this work; (b) The molecular structures of used EL materials; (c) The specific constituents of EML.



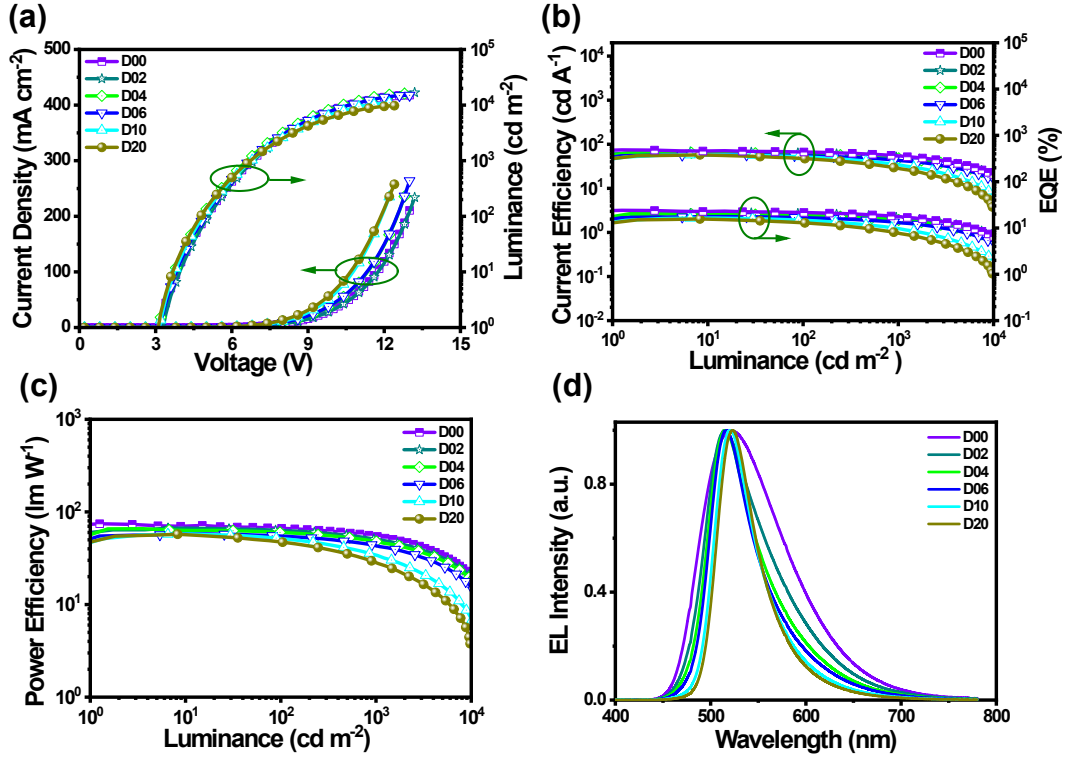

**Fig. S5** Device performance of D00, D02, D04, D06, D10 and D20: (a) Current density-voltage-luminance characteristics; (b) Current efficiency and EQE vs luminance; (c) Power efficiency vs luminance; (d) EL spectra at 1000  $\text{cd m}^{-2}$ .

**Table S4.** Summary of the device performance of D00, D02, D04, D06, D10 and D20.

| Device | $V_{\text{on}}^{\text{a}}$<br>(V) | $L_{\text{max}}^{\text{b}}$<br>( $\text{cd m}^{-2}$ ) | $\text{CE}^{\text{c}}$<br>( $\text{cd A}^{-1}$ ) | $\text{PE}^{\text{c}}$<br>( $\text{lm W}^{-1}$ ) | $\text{EQE}^{\text{c}}$<br>(%) | $\text{CIE}^{\text{d}}$<br>(x, y) | $\text{SE}^{\text{e}}$<br>(%) | $\lambda_{\text{EL}}^{\text{f}}$<br>(nm) | $\text{FWHM}^{\text{g}}$<br>(nm) |
|--------|-----------------------------------|-------------------------------------------------------|--------------------------------------------------|--------------------------------------------------|--------------------------------|-----------------------------------|-------------------------------|------------------------------------------|----------------------------------|
| D00    | 3.2                               | 15067                                                 | 74.5/54.3                                        | 73.1/25.1                                        | 24.1/17.6                      | (0.32,0.55)                       | -                             | 522                                      | 102                              |
| D02    | 3.2                               | 16735                                                 | 66.9/50.9                                        | 55.8/24.5                                        | 21.3/16.9                      | (0.31,0.58)                       | 60.97                         | 514                                      | 77                               |
| D04    | 3.2                               | 16034                                                 | 65.9/48.0                                        | 60.8/22.8                                        | 20.5/14.9                      | (0.29,0.60)                       | 70.80                         | 515                                      | 63                               |
| D06    | 3.2                               | 14969                                                 | 58.0/44.2                                        | 53.8/21.0                                        | 17.7/13.4                      | (0.29,0.61)                       | 76.88                         | 517                                      | 57                               |
| D10    | 3.2                               | 11028                                                 | 57.8/33.9                                        | 52.1/15.6                                        | 16.4/9.6                       | (0.28,0.64)                       | 86.28                         | 521                                      | 52                               |
| D20    | 3.2                               | 9738                                                  | 57.4/27.7                                        | 53.7/12.8                                        | 15.7/7.1                       | (0.28,0.65)                       | 91.69                         | 523                                      | 48                               |

<sup>a</sup> Turn-on voltage at 1  $\text{cd m}^{-2}$ ; <sup>b</sup> Maximum luminance; <sup>c</sup> Data at maximum and 1000  $\text{cd m}^{-2}$ ; <sup>d</sup> Data at a driving voltage of 6 V; <sup>e</sup> Sensitization efficiency; <sup>f</sup> EL peak wavelength; <sup>g</sup> Full width at half maximum; CE: Current efficiency; PE: power efficiency; EQE: external quantum efficiency; CIE: Commission Internationale de l'Eclairage.

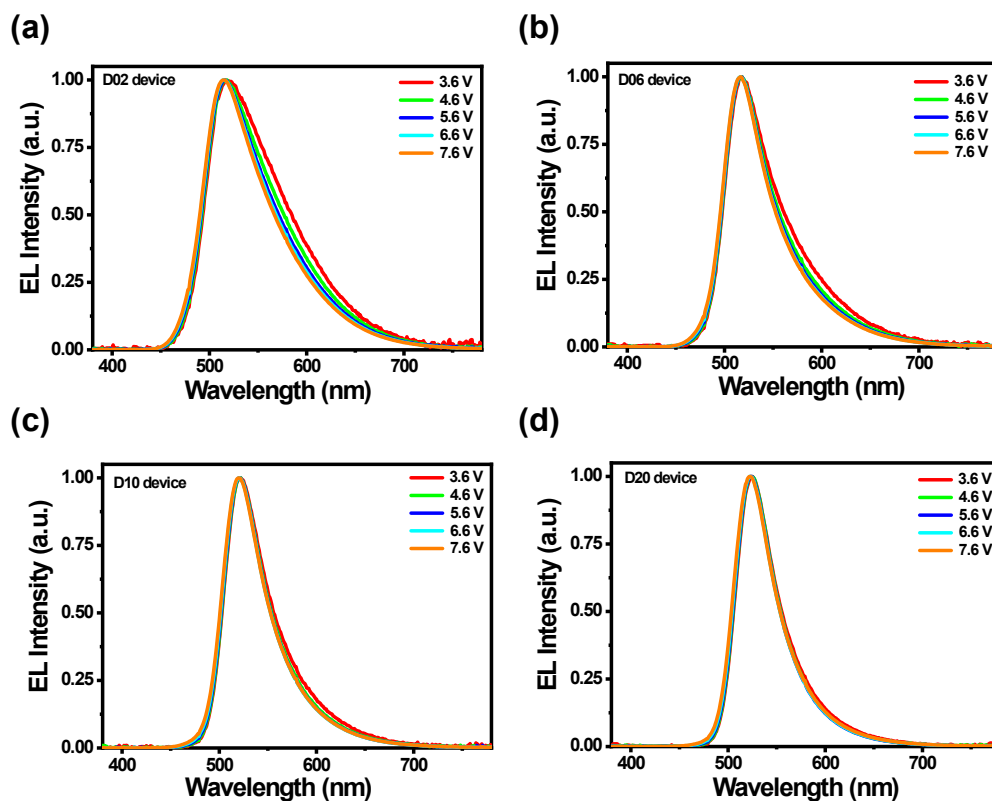

**Fig. S6** Voltage dependence of the EL spectra for device D02 (a), D06 (b), D10 (c) and D20 (d).

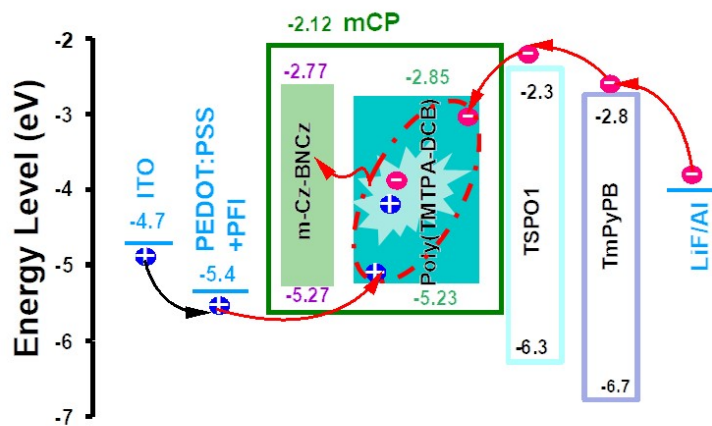

**Fig. S7** The energy level and excitation transfer diagram of the device.

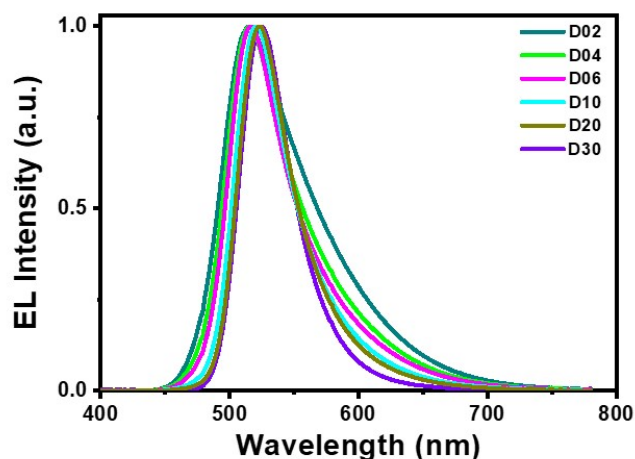

**Fig. S8** The calculation of sensitization efficiency (SE) for sensitized TADF devices. The SE values were determined to be 60.97%, 70.80%, 76.88%, 86.28%, and 91.69% with the doping concentrations ranging from 0.2 wt% to 2.0 wt%, respectively, utilizing the equation  $SE = 1 - P_{\text{sen}}/P_{\text{total}}$ , where  $P_{\text{sen}}$  represents the emission intensity of the TADF sensitizer in the EL spectra and  $P_{\text{total}}$  denotes the total emission intensity of the EL spectra.

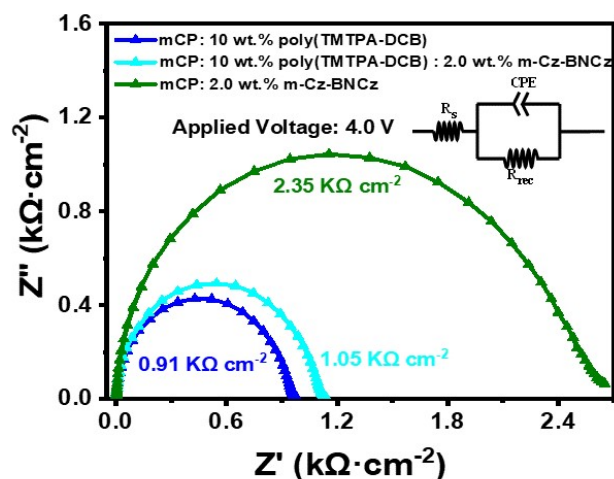

**Fig. S9** Nyquist plots with a forward voltage of 4.0 V (Inset: simplified equivalent circuit).

## 5. References

1. J. Rao, L. Yang, X. Li, L. Zhao, S. Wang, H. Tian, J. Ding and L. Wang, *Angew. Chem. Int. Ed.*, 2021, **60**, 9635-9641.
2. L. Yang, X. Li, Q. Yang, S. Wang, H. Tian, J. Ding and L. Wang, *Chem. Eng. J.*, 2022, **436**, 135221.
3. C. Zhang, Y. Lu, Z. Liu, Y. Zhang, X. Wang, D. Zhang and L. Duan, *Adv. Mater.*, 2020, **32**, 2004040.
4. J. Hu, Q. Li, S. Shao, L. Wang, X. Jing and F. Wang, *Adv. Opt. Mater.*, 2020, **8**, 1902100.
